# Supplementary material
Source: Springer Nature journal article supplement (https://www.springermedizin.de/resource/supplementary/12874_2005_104_MOESM2_ESM.pdf/9433774)

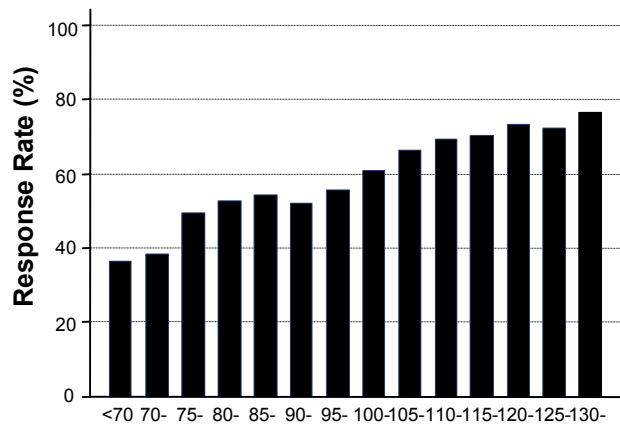

**Cognition score at 7**

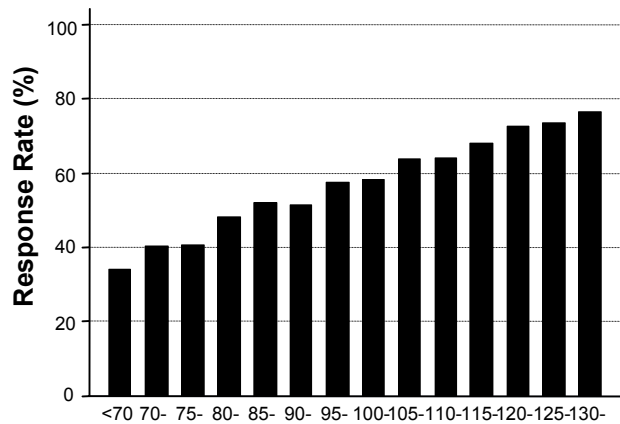

**Cognition score at 9**

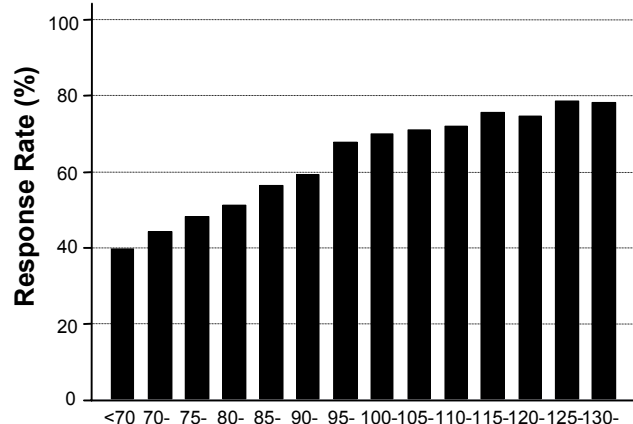

**Cognition score at 11**

Supplement: MOESM2 [file 9433774]
